# Supplementary material for: Polyamine transporter potABCD is required for virulence of encapsulated but not nonencapsulated Streptococcus pneumoniae
Source: PubMed Central journal article supplement (PMC5460881; doi:10.1371/journal.pone.0179159), 2017-06-06
Supplement: pone.0179159.s001.pdf [file pone.0179159.s001.pdf]

Ply Expression Determined by ELISA

| Sample # | MNZ67 | PIP01 |
|----------|-------|-------|
| 1        | 0.331 | 0.209 |
| 1        | 0.329 | 0.211 |
| 1        | 0.436 | 0.21  |
| 2        | 0.358 | 0.25  |
| 2        | 0.353 | 0.244 |
| 2        | 0.324 | 0.245 |
| 3        | 0.341 | 0.302 |
| 3        | 0.394 | 0.331 |
| 3        | 0.371 | 0.308 |

Average

|   |              |              |
|---|--------------|--------------|
| 1 | 0.3653333333 | 0.2566666667 |
| 2 | 0.345        | 0.2463333333 |
| 3 | 0.3686666667 | 0.3136666667 |

Percent Expression Releative to WT

|     | 67 PIP01    |
|-----|-------------|
| 100 | 70.25547445 |
| 100 | 71.4009662  |
| 100 | 85.08137    |

| Hemolysis Assay | Triton X-114 | MNZ67        | PIP01 |
|-----------------|--------------|--------------|-------|
| 1               | 0.475        | 0.468        |       |
| 1               | 0.441        | 0.459        |       |
| 1               | 0.461        | 0.477        |       |
| 2               | 0.459        | 0.46         |       |
| 2               | 0.453        | 0.452        |       |
| 2               | 0.459        | 0.445        |       |
| 3               | 0.443        | 0.435        |       |
| 3               | 0.427        | 0.469        |       |
| 3               | 0.462        | 0.441        |       |
| Average         |              |              |       |
| 1               | 0.459        | 0.4562222222 |       |
| 2               | 0.457        | 0.4523333333 |       |
| 3               | 0.444        | 0.4483333333 |       |

| Percent Hemolysis<br>Relative to + Control | Triton X-114 | MNZ67 | PIP01 |
|--------------------------------------------|--------------|-------|-------|
|                                            | 100          | 102   | 57.22 |
|                                            | 100          | 99    | 65    |
|                                            | 100          | 101   | 67    |

PspK Levels Determined by ELISA

| Sample  | MNZ67 | PIP01 |
|---------|-------|-------|
| 1       | 0.27  | 0.8   |
| 1       | 0.263 | 0.828 |
| 1       | 0.259 | 0.835 |
| 2       | 0.265 | 0.56  |
| 2       | 0.292 | 0.542 |
| 2       | 0.271 | 0.554 |
| 3       | 0.21  | 0.75  |
| 3       | 0.227 | 0.8   |
| 3       | 0.223 | 0.76  |
| Average |       |       |
| 1       | 0.264 | 0.821 |
| 2       | 0.276 | 0.552 |
| 3       | 0.22  | 0.77  |

Percent Relative to WT

| 67 PIP01 |        |
|----------|--------|
| 100      | 200    |
| 100      | 310.98 |
| 100      | 350    |

CT Values and GyrA Rep-1 GyrA Rep-2 PspK Rep-1 PspK Rep-1

| Sample     | GyrA Rep-1 | GyrA Rep-2 | PspK Rep-1 | PspK Rep-1 |
|------------|------------|------------|------------|------------|
| Sample     | 24.3       | 23.5       | 26.1       | 28.6       |
| 67- Exp 1  | 23.8       | 23.8       | 25.9       | 27.3       |
| PIP01-Exp1 | 27.3       | 26.7       | 28.3       | 27.2       |
| 67-Exp2    | 23.9       | 24.6       | 24.1       | 24.8       |
| PIP01-Exp2 | 25.2       | 26.8       | 29.5       | 29.8       |
| 67-Exp3    | 24.1       | 23.9       | 27.1       | 27.6       |
| PIp01-Exp3 |            |            |            |            |

| Sample     | GyrA Average | PspK Average | $\Delta Ct$ | $\Delta\Delta Ct$ | $2-\Delta\Delta CT$ |   |
|------------|--------------|--------------|-------------|-------------------|---------------------|---|
| 67- Exp 1  | 23.9         | 27.35        | 3.45        | 0                 | 0                   | 1 |
| PIP01-Exp1 | 23.8         | 26.6         | 2.8         | -0.65             | 1.569168196         |   |
| 67-Exp2    | 27           | 27.75        | 0.75        | 0                 | 0                   | 1 |
| PIP01-Exp2 | 24.25        | 24.45        | 0.2         | -0.55             | 1.464085696         |   |
| 67-Exp3    | 26           | 29.65        | 3.65        | 0                 | 0                   | 1 |
| PIp01-Exp3 | 24           | 27.35        | 3.35        | -0.3              | 1.231144413         |   |

PspK After *potD* Complementation

|   | MNZ67 | PIP01 | PIP02 |
|---|-------|-------|-------|
| 1 | 0.235 | 0.315 | 0.22  |
| 1 | 0.246 | 0.313 | 0.219 |
| 1 | 0.29  | 0.32  | 0.209 |
| 2 | 0.221 | 0.37  | 0.212 |
| 2 | 0.276 | 0.365 | 0.232 |
| 2 | 0.298 | 0.345 | 0.235 |
| 3 | 0.254 | 0.295 | 0.225 |
| 3 | 0.298 | 0.31  | 0.235 |
| 3 | 0.24  | 0.283 | 0.224 |

Average

|   |       |       |             |
|---|-------|-------|-------------|
| 1 | 0.257 | 0.324 | 0.223444444 |
| 2 | 0.265 | 0.36  | 0.226333333 |
| 3 | 0.264 | 0.296 | 0.228       |

Percent Relative to WT

| MNZ67 | PIP01       | PIP02      |
|-------|-------------|------------|
| 100   | 126.070039  | 86.9433636 |
| 100   | 112.1212121 | 85.4088    |
| 100   | 135.8490566 | 86.364     |

Ply After *potD* Complementation

|  | MNZ67 | PIP01 | PIP02 |
|--|-------|-------|-------|
|  | 0.345 | 0.258 | 0.5   |
|  | 0.339 | 0.225 | 0.59  |
|  | 0.327 | 0.282 | 0.625 |
|  | 0.312 | 0.25  | 0.462 |
|  | 0.332 | 0.249 | 0.447 |
|  | 0.31  | 0.3   | 0.477 |
|  | 0.319 | 0.252 | 0.412 |
|  | 0.321 | 0.31  | 0.405 |
|  | 0.356 | 0.325 | 0.409 |

Average

|   |       |             |             |
|---|-------|-------------|-------------|
| 1 | 0.337 | 0.272333333 | 0.480777778 |
| 2 | 0.318 | 0.266333333 | 0.462       |
| 3 | 0.332 | 0.295666667 | 0.408666667 |

Percent Relative to WT

| MNZ67 | PIP01      | PIP02       |
|-------|------------|-------------|
| 100   | 80.811078  | 123.0923695 |
| 100   | 83.752605  | 145.283019  |
| 100   | 89.0562249 | 142.664029  |
