# Supplementary material for: Polyamine transporter potABCD is required for virulence of encapsulated but not nonencapsulated Streptococcus pneumoniae
Source: PubMed Central journal article supplement (PMC5460881; doi:10.1371/journal.pone.0179159), 2017-06-06
Supplement: pone.0179159.s003.pdf [file pone.0179159.s003.pdf]

CRYSTAL VIOLET BIOFILM STAINING READ AT OD620

| REPLICATES | 67 PIP01    | T4          | T4ΔpotD     |        |
|------------|-------------|-------------|-------------|--------|
| 1          | 0.224       | 0.399       | 0.309       | 0.158  |
| 1          | 0.251       | 0.409       | 0.322       | 0.151  |
| 1          | 0.277       | 0.428       | 0.32        | 0.171  |
| 2          | 0.172       | 0.184       | 0.35        | 0.2    |
| 2          | 0.201       | 0.269       | 0.357       | 0.209  |
| 2          | 0.236       | 0.304       | 0.337       | 0.224  |
| 3          | 0.175       | 0.299       | 0.312       | 0.23   |
| 3          | 0.209       | 0.397       | 0.321       | 0.236  |
| 3          | 0.296       | 0.401       | 0.333       | 0.212  |
| 4          | 0.187       | 0.3         | 0.345       | 0.1    |
| 4          | 0.216       | 0.368       | 0.358       | 0.105  |
| 4          | 0.242       | 0.31        | 0.377       | 0.107  |
| 5          |             |             | 0.372       | 0.225  |
| 5          |             |             | 0.359       | 0.224  |
| 5          |             |             | 0.409       | 0.262  |
| 6          |             |             | 0.371       | 0.2    |
| 6          |             |             | 0.379       | 0.21   |
| 6          |             |             | 0.392       | 0.205  |
| AVERAGE    |             |             |             |        |
| 1          | 0.250666667 | 0.412       | 0.317       | 0.1905 |
| 2          | 0.203       | 0.252333333 | 0.348       | 0.211  |
| 3          | 0.226666667 | 0.365666667 | 0.322       | 0.226  |
| 4          | 0.215       | 0.326       | 0.36        | 0.104  |
| 5          |             |             | 0.38        | 0.237  |
| 6          |             |             | 0.380666667 | 0.205  |
