# Supplementary material for: Polyamine transporter potABCD is required for virulence of encapsulated but not nonencapsulated Streptococcus pneumoniae
Source: PubMed Central journal article supplement (PMC5460881; doi:10.1371/journal.pone.0179159), 2017-06-06
Supplement: pone.0179159.s005.pdf [file pone.0179159.s005.pdf]

B1-4 are from experiment 1. B5-10 are from experiment 2

E= Exudate, W= wash, B=Whole Bullae

|     | PP01     | SUM PER BULLA | LOG CFU per B |
|-----|----------|---------------|---------------|
| E1  | 1.13E+06 | B1            |               |
| W1  | 5.25E+05 | 2.33E+06      | 6.367355921   |
| B1  | 6.75E+05 |               |               |
| E2  | 5.00E+06 | B2            |               |
| W2  | 1.13E+06 | 7.18E+06      | 6.856124444   |
| B2  | 1.05E+06 | B3            |               |
| E3  | 5.00E+01 | 1.25E+05      | 5.09725731    |
| W3  | 5.00E+01 | B4            |               |
| B3  | 1.25E+05 | 8.26E+04      | 4.916980047   |
| E4  | 8.25E+04 | B5            |               |
| W4  | 5.00E+01 | 9.33E+04      | 4.969997999   |
| B4  | 5.00E+01 | B6            |               |
| E5  | 5.00E+01 | 2.01E+04      | 4.303196057   |
| W5  | 7.75E+02 | B7            |               |
| B5  | 9.25E+04 | 9.04E+04      | 4.956384563   |
| E6  | 2.00E+04 | B8            |               |
| W6  | 5.00E+01 | 1.37E+05      | 5.136543009   |
| B6  | 5.00E+01 | B9            |               |
| E7  | 8.24E+04 | 4.82E+04      | 4.683236212   |
| W7  | 4.53E+03 | B10           |               |
| B7  | 3.52E+03 | 2.38E+05      | 5.376412697   |
| E8  | 9.44E+02 |               |               |
| W8  | 1.00E+03 |               |               |
| B8  | 1.35E+05 |               |               |
| E9  | 3.21E+04 |               |               |
| W9  | 8.14E+03 |               |               |
| B9  | 8.00E+03 |               |               |
| E10 | 8.90E+04 |               |               |
| W10 | 7.18E+04 |               |               |
| B10 | 7.71E+04 |               |               |

B1-4 are from experiment 1. B5-10 are from experiment 2

E= Exudate, W= wash, B=Whole Bullae

| Bulla | MNZ67        | SUM PER BULLA | LOG CFU per B |
|-------|--------------|---------------|---------------|
| E1    | 8.90E+04     |               |               |
| W1    | 7.18E+04 B1  | 1.85E+05      | 5.267406419   |
| B1    | 2.43E+04     |               |               |
| E2    | 8.75E+03     |               |               |
| W2    | 1.63E+03 B2  | 2.99E+04      | 4.475380593   |
| B2    | 1.95E+04     |               |               |
| E3    | 1.99E+04 B3  | 1.50E+05      | 5.176322821   |
| W3    | 5.18E+03     |               |               |
| B3    | 1.25E+05     |               |               |
| E4    | 7.95E+03 B4  | 9.45E+04      | 4.975321497   |
| W4    | 3.20E+04     |               |               |
| B4    | 5.45E+04     |               |               |
| E5    | 1.75E+04 B5  | 8.82E+04      | 4.945320841   |
| W5    | 2.05E+04     |               |               |
| B5    | 5.02E+04     |               |               |
| E6    | 1.94E+04     |               |               |
| W6    | 7.65E+01 B6  | 2.05E+04      | 4.31126527    |
| B6    | 1.00E+03     |               |               |
| E7    | 2.00E+03     |               |               |
| W7    | 1.26E+04 B7  | 1.63E+04      | 4.211267418   |
| B7    | 1.72E+03     |               |               |
| E8    | 1.37E+03     |               |               |
| W8    | 1.00E+04 B8  | 3.04E+04      | 4.482448367   |
| B8    | 1.90E+04     |               |               |
| E9    | 6.00E+04     |               |               |
| W9    | 1.33E+04 B9  | 7.37E+04      | 4.867467488   |
| B9    | 4.50E+02     |               |               |
| E10   | 3.21E+04     |               |               |
| W10   | 5.50E+01 B10 | 3.22E+04      | 4.507667007   |
| B10   | 5.00E+01     |               |               |

B1-4 are from experiment 1. B5-10 are from experiment 2

E= Exudate, W= wash, B=Whole Bullae

| Bulla | T4          | SUM PER BULLA | LOG CFU per B |
|-------|-------------|---------------|---------------|
| E1    | 1.75E+05 B1 | 2.38E+05      | 5.375663614   |
| W1    | 6.25E+04    |               |               |
| B1    | 0.00E+00    |               |               |
| E2    | 5.24E+04 B2 | 7.07E+06      | 6.849259672   |
| W2    | 7.00E+06    |               |               |
| B2    | 1.50E+04    |               |               |
| E3    | 6.00E+04 B3 | 7.57E+04      | 4.87909588    |
| W3    | 1.50E+04    |               |               |
| B3    | 7.00E+02    |               |               |
| E4    | 2.00E+02 B4 | 7.01E+06      | 6.845544513   |
| W4    | 7.00E+03    |               |               |
| B4    | 7.00E+06    |               |               |
| E5    | 1.03E+07 B5 | 2.41E+07      | 7.382287266   |
| W5    | 1.50E+04    |               |               |
| B5    | 1.38E+07 B6 | 2.55E+07      | 7.407135862   |
| E6    | 3.50E+04    |               |               |
| W6    | 1.70E+07    |               |               |
| B6    | 8.50E+06    |               |               |
| E7    | 4.00E+05 B7 | 4.05E+06      | 6.607455023   |
| W7    | 3.50E+06    |               |               |
| B7    | 1.50E+05    |               |               |
| E8    | 1.90E+05 B8 | 3.76E+06      | 6.575187845   |
| W8    | 4.70E+05    |               |               |
| B8    | 3.10E+06    |               |               |

B1-4 are from experiment 1. B5-10 are from experiment 2

E= Exudate, W= wash, B=Whole Bullae

| Bulla | T4( $\Delta$ potD) | SUM PER BULLA | LOG CFU per B |
|-------|--------------------|---------------|---------------|
| E1    | 5.00E+01 B1        | 1.50E+02      | 2.176091259   |
| W1    | 5.00E+01           |               |               |
| B1    | 5.00E+01           |               |               |
| E2    | 5.00E+01 B2        | 1.25E+02      | 2.096910013   |
| W2    | 2.50E+01           |               |               |
| B2    | 5.00E+01           |               |               |
| E3    | 2.50E+01 B3        | 1.16E+04      | 4.063521      |
| W3    | 1.15E+04           |               |               |
| B3    | 5.00E+01           |               |               |
| E4    | 5.00E+01 B4        | 1.26E+04      | 4.100370545   |
| W4    | 1.25E+04           |               |               |
| B4    | 5.00E+01           |               |               |
| E5    | 3.75E+05 B5        | 3.75E+05      | 5.574147064   |
| W5    | 5.00E+01           |               |               |
| B5    | 5.00E+01 B6        | 2.51E+04      | 4.399673721   |
| E6    | 2.50E+04           |               |               |
| W6    | 5.00E+01 B7        | 5.51E+04      | 4.741151599   |
| B6    | 5.00E+01           |               |               |
| E7    | 5.50E+04 B8        | 2.01E+04      | 4.303196057   |
| W7    | 5.00E+01           |               |               |
| B7    | 5.00E+01           |               |               |
| E8    | 2.00E+04 B9        | 6.57E+03      | 3.81756537    |
| W8    | 5.00E+01           |               |               |
| B8    | 5.00E+01           |               |               |
| E9    | 6.70E+02           |               |               |
| W9    | 7.50E+02 B10       | 5.25E+03      | 3.720159303   |
| B9    | 5.15E+03           |               |               |
| E10   | 1.00E+03           |               |               |
| W10   | 4.00E+03           |               |               |
| B10   | 2.50E+02           |               |               |

B1-4 are from experiment 1. B5-10 are from experiment 2  
E= Exudate, W= wash, B=Whole Bullae

Bulla
