# Supplementary material for: Polyamine transporter potABCD is required for virulence of encapsulated but not nonencapsulated Streptococcus pneumoniae
Source: PubMed Central journal article supplement (PMC5460881; doi:10.1371/journal.pone.0179159), 2017-06-06
Supplement: pone.0179159.s006.pdf [file pone.0179159.s006.pdf]

LUNGS HARVESTED 2 DAYS POST INFECTION

67 PIP01

|   |          |          |
|---|----------|----------|
| 1 | 1.00E+02 | 2.90E+03 |
| 2 | 3.00E+02 | 3.40E+03 |
| 3 | 1.00E+02 | 2.40E+03 |
| 4 | 3.00E+02 | 2.50E+03 |
| 5 | 2.00E+02 | 1.50E+03 |

Log CFU per Mouse

|             |             |
|-------------|-------------|
| 2           | 3.462397998 |
| 2.477121255 | 3.531478917 |
| 2           | 3.380211242 |
| 2.477121255 | 3.397940009 |
| 2.301029996 | 3.176091259 |
